# Supplementary material for: Liquid crystals of gold(I) N-heterocyclic carbene complexes
Source: Royal Society of Chemistry journal article supplement (doi:10.1039/b907171g), 2009-01-01
Supplement: b907171g.pdf [file b907171g.pdf]

**Supporting information**

**Liquid Crystals of Gold(I) N-Heterocyclic  
Carbene Complexes**

**Roy T. W. Huang, W. C. Wang, Y. U. Yang, J. T. Lu and Ivan J. B. Lin\***

*Department of Chemistry, National Dong Hwa University, Hualien, 974, Taiwan*

Department of Chemistry, National Dong Hwa University, Shoufeng,

Hualien 974, Taiwan

Tel : +886-3-863-3599

Fax : +886-3-863-3570

E-mail: [ijblin@mail.ndhu.edu.tw](mailto:ijblin@mail.ndhu.edu.tw)

**Table S1. Summary of crystallographic data for  $\text{II}_{18}\text{A}_{18}$ .**

|                                                     | $\text{II}_{18}\text{A}_{18}$                              |
|-----------------------------------------------------|------------------------------------------------------------|
| Formula                                             | $\text{C}_{60}\text{H}_{116}\text{N}_5\text{O}_3\text{Au}$ |
| Fw                                                  | 1152.54                                                    |
| Crystal syst                                        | Triclinic                                                  |
| Space group                                         | P-1                                                        |
| $a$ , Å                                             | 10.1515(15)                                                |
| $b$ , Å                                             | 10.3189(15)                                                |
| $c$ , Å                                             | 31.290(5)                                                  |
| $A$ , deg                                           | 99.310(4)                                                  |
| $B$ , deg                                           | 90.394(5)                                                  |
| $\Gamma$ , deg                                      | 98.390(4)                                                  |
| $V$ , Å <sup>3</sup>                                | 3198.3(8)                                                  |
| $Z$                                                 | 2                                                          |
| $D_{\text{calc}}$ , Mg/m <sup>3</sup>               | 1.197                                                      |
| $T$ , K                                             | 273                                                        |
| $\mu$ , mm <sup>-1</sup>                            | 2.34                                                       |
| $F(000)$                                            | 1228                                                       |
| Crystal size/mm                                     | 0.20 x 0.18 x 0.18                                         |
| $\theta_{\text{min}}$ , $\theta_{\text{max}}$ , deg | 2.0-25.5                                                   |
| Reflections collected                               | 38752                                                      |
| Independent reflections( $R_{\text{int}}$ )         | 11924(0.072)                                               |
| Data/restraints/<br>parameters                      | 11924/0/625                                                |
| Goodness-of-fit on $F^2$                            | 1.096                                                      |
| $R1/wR2$ ( $I > 2\sigma(I)$ )                       | 0.0674/ 0.1669                                             |
| $R1/wR2$ (all data)                                 | 0.0832/ 0.1782                                             |

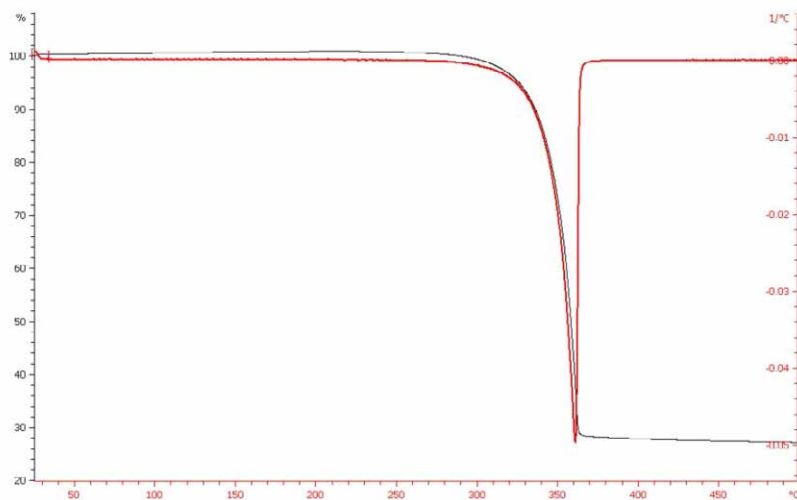

(a)

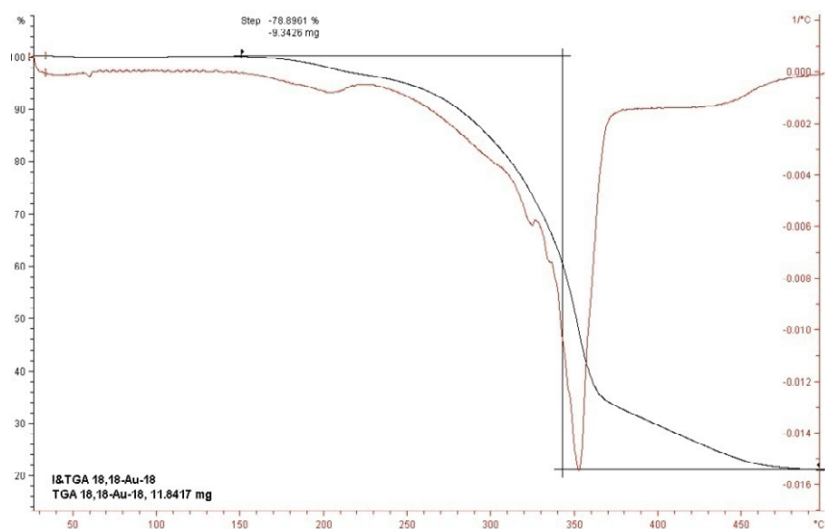

(b)

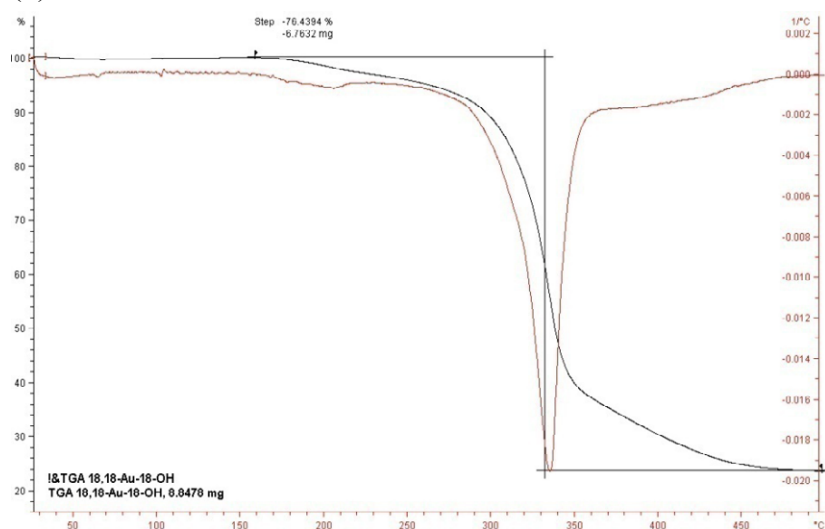

(c)

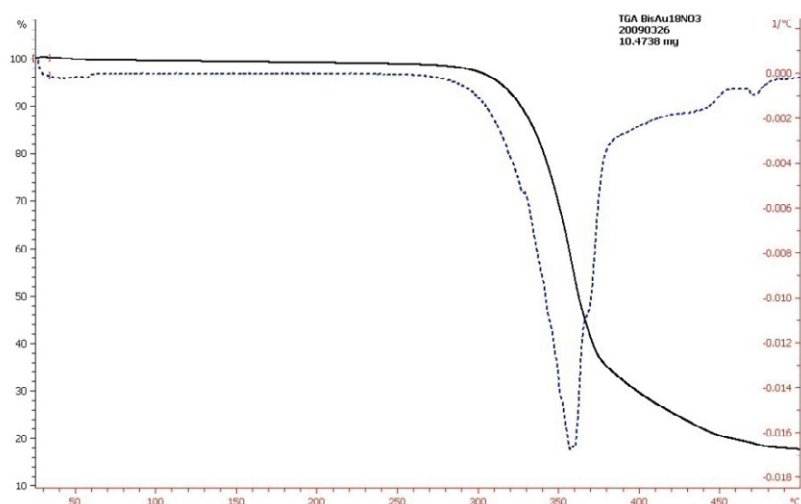

(d)

**Figure S1** TGA diagram of (a) **I**<sub>18</sub>, (b) **II**<sub>18</sub>**A**<sub>18</sub>, (c) **II**<sub>18</sub>**B**<sub>18</sub>, and (d) **III**<sub>18</sub>.

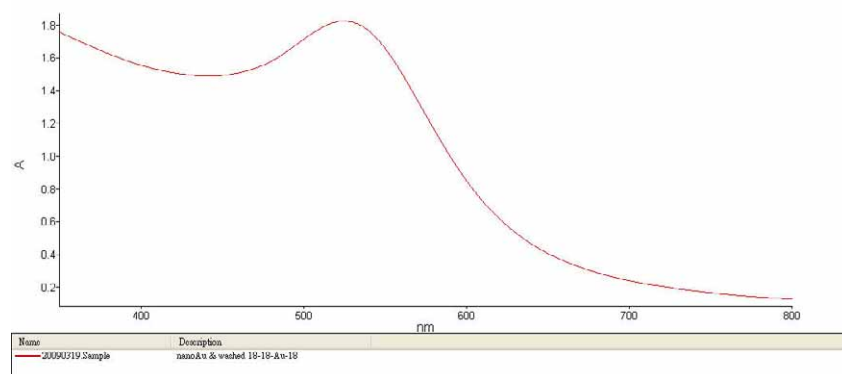

**Figure S2** UV spectrum of Au NPs (prepared from **II**<sub>18</sub>**A**<sub>18</sub>) in CH<sub>2</sub>Cl<sub>2</sub> ( $\lambda_{\max}$  at 524 nm).

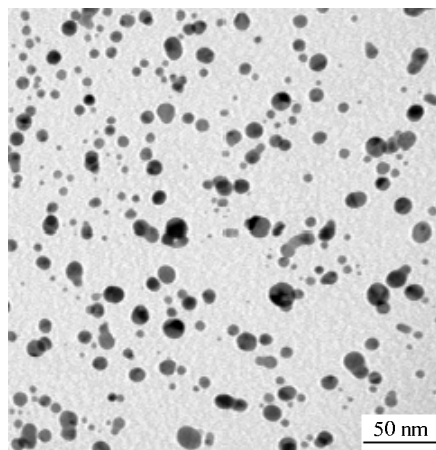

**Figure S3** TEM image of Au NPs (prepared from **II**<sub>18</sub>**A**<sub>18</sub>).
